# Supplementary material for: Unsupervised Deep Anomaly Detection in Chest Radiographs
Source: PubMed Central journal article supplement (PMC8289984; doi:10.1007/s10278-020-00413-2), 2021-02-08
Supplement: 10278_2020_413_MOESM1_ESM.pdf [file 10278_2020_413_MOESM1_ESM.pdf]

**a**

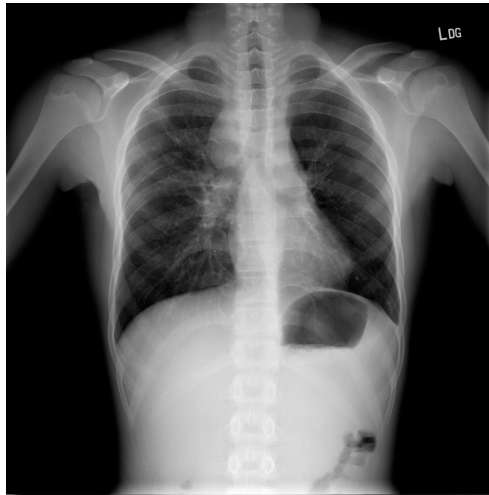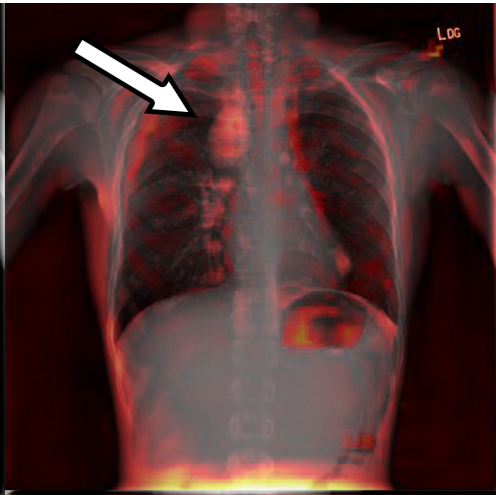

**b**

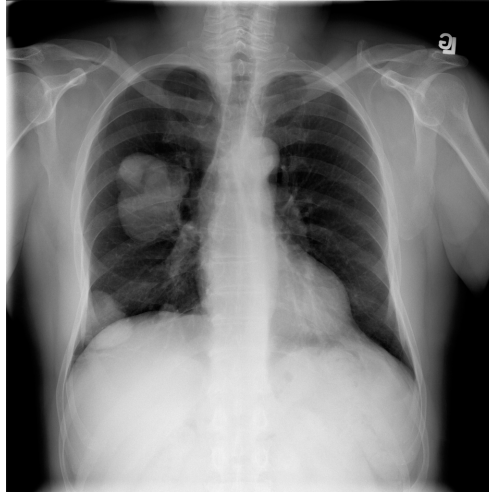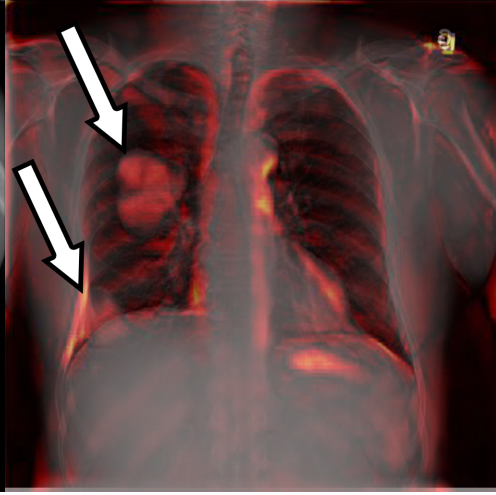

Lung masses (arrows).

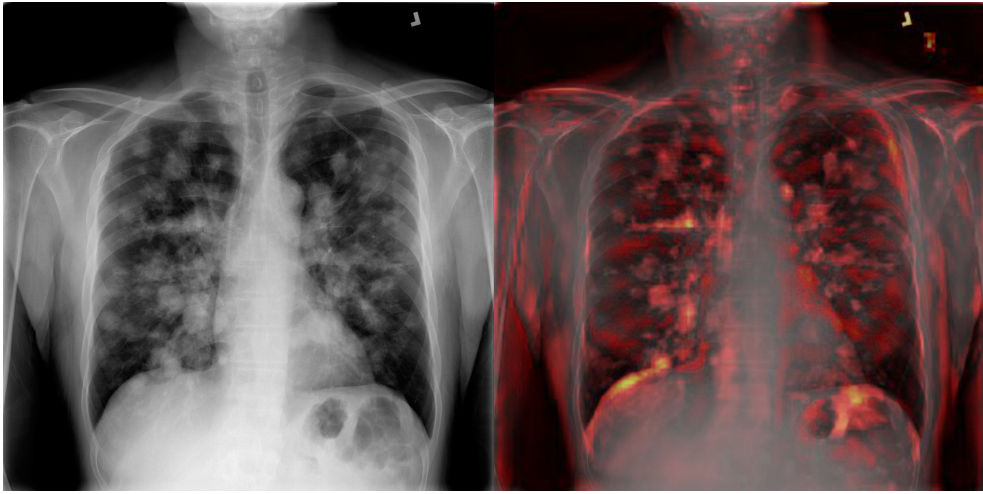

Multiple nodules.

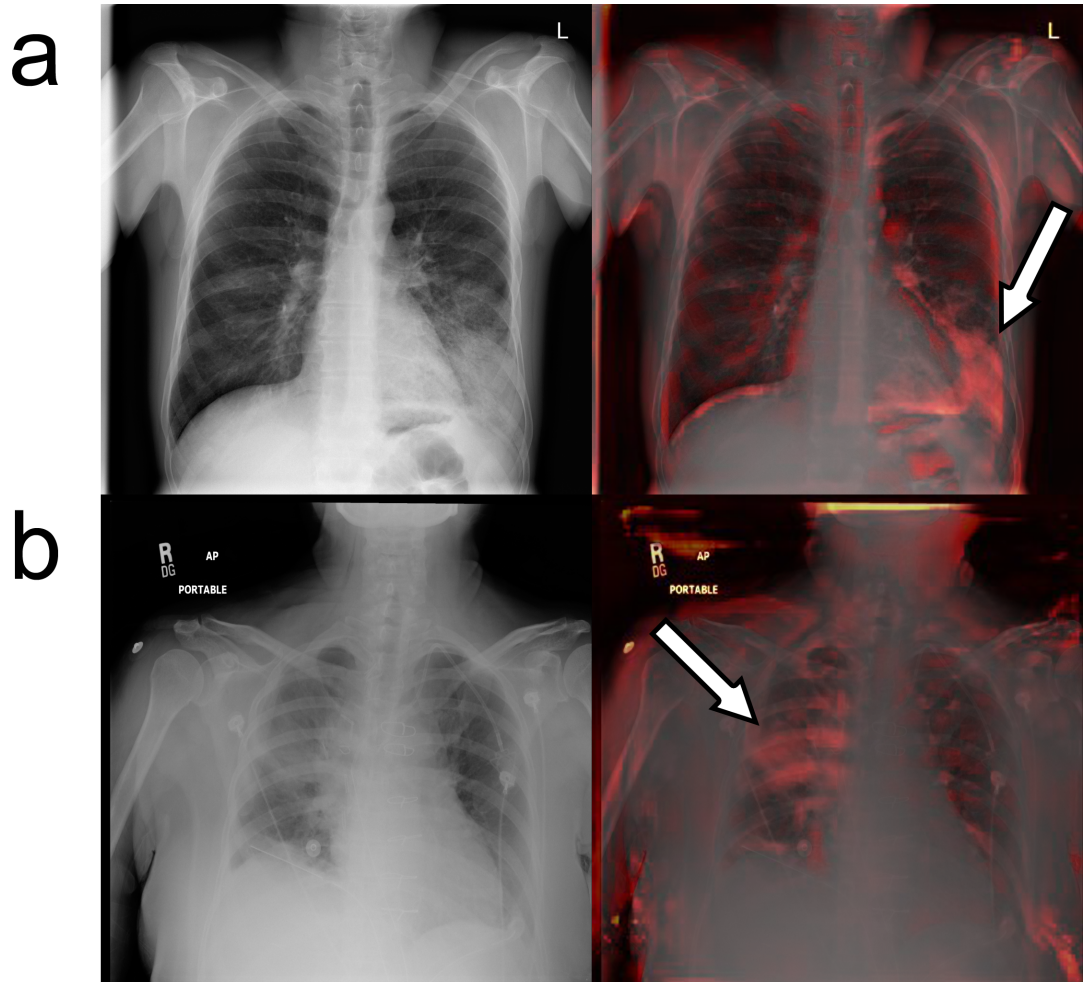

Lung opacities (arrows).

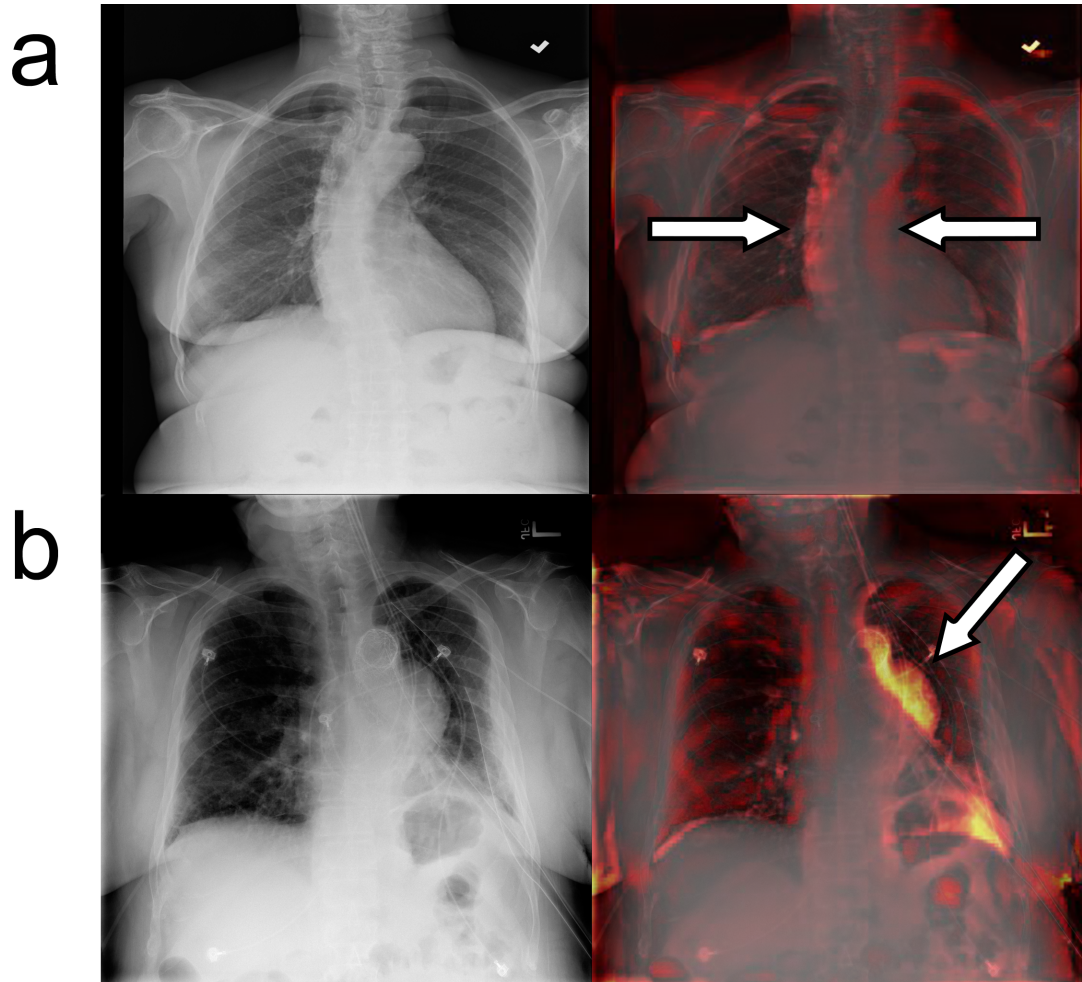

(a) Scoliosis (arrows) and (b) Thoracic aortic aneurysm (arrow).



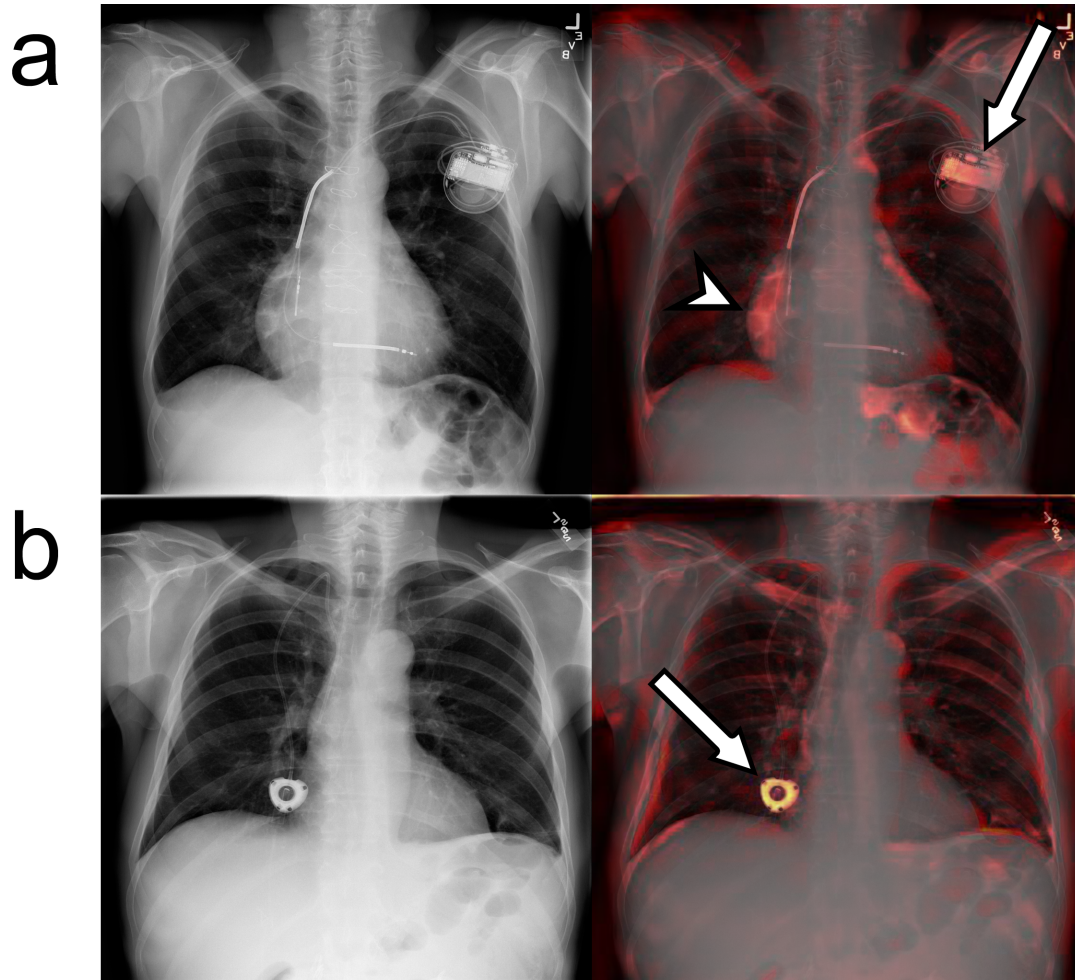

Medical implants.

(a) Cardiac pacemaker (arrow) and cardiomegaly (arrowhead). (b) chest port (arrow).
